# Supplementary material
Source: publisher figshare collection journal article supplement (https://sage.figshare.com/ndownloader/files/20105540)
Supplement: Supplementary file 1 [file 20105540]

**Supplement 2. A comparison of socio-demographic characteristics, satisfaction from HBR and level of independence between participants who participated in the second questionnaire (6-month follow-up) and participants who dropped out**

|                         |                                            | <b>Did not<br/>participate<br/>in 2<sup>nd</sup> round<br/>N= 50</b> | <b>Participated<br/>in 2<sup>nd</sup> round<br/>N= 96</b> | <b>P</b>    |
|-------------------------|--------------------------------------------|----------------------------------------------------------------------|-----------------------------------------------------------|-------------|
| <b>Age</b>              | Mean (SD)                                  | 64.32 (18.47)                                                        | 65.89 (13.47)                                             | 0.59        |
|                         |                                            | <b>N (%)</b>                                                         | <b>N (%)</b>                                              |             |
| <b>Gender</b>           | Men                                        | 16 (32.0%)                                                           | 36 (37.5%)                                                | 0.51        |
|                         | Women                                      | 34 (68.0%)                                                           | 60 (62.5%)                                                |             |
|                         | Married                                    | 33 (68.8%)                                                           | 60 (63.8%)                                                | <b>0.02</b> |
| <b>Family status</b>    | Single                                     | 6 (12.5%)                                                            | 3 (3.2%)                                                  |             |
|                         | Widow                                      | 9 (18.8%)                                                            | 22 (23.4%)                                                |             |
|                         | Divorce                                    | 0 (0%)                                                               | 9 (9.6%)                                                  |             |
|                         | Life partner                               | 33 (66.0%)                                                           | 63 (66.3%)                                                | <b>0.03</b> |
| <b>Living situation</b> | Alone                                      | 1 (2.0%)                                                             | 13 (13.7%)                                                |             |
|                         | Grown children/<br>other family<br>members | 11 (22.0%)                                                           | 9 (9.5%)                                                  |             |
|                         | Caregiver/facility                         | 5 (10%)                                                              | 10 (10.5%)                                                | 0.80        |
| <b>Type of surgery</b>  | Knee<br>replacement                        | 11 (22.0%)                                                           | 28 (29.2%)                                                |             |
|                         | Fracture                                   | 20 (40.0%)                                                           | 31 (32.3%)                                                |             |
|                         | Hip replacement                            | 12 (24.0%)                                                           | 21 (21.9%)                                                |             |
|                         | Fixation                                   | 2 (4.0%)                                                             | 5 (5.2%)                                                  |             |

|                                                            |                     | <b>Did not<br/>participate<br/>in 2<sup>nd</sup> round<br/>N= 50</b> | <b>Participated<br/>in 2<sup>nd</sup> round<br/>N= 96</b> | <b>P</b>    |
|------------------------------------------------------------|---------------------|----------------------------------------------------------------------|-----------------------------------------------------------|-------------|
|                                                            | Spine               | 1 (2.0%)                                                             | 5 (5.2%)                                                  |             |
|                                                            | Other               | 4 (8.0%)                                                             | 6 (6.3%)                                                  |             |
| <b>Private health<br/>insurance<br/>ownership</b>          | No                  | 40 (80%)                                                             | 81 (84.4%)                                                | 0.50        |
|                                                            | Yes                 | 10 (20%)                                                             | 15 (15.6%)                                                |             |
| <b>Hospitalization<br/>days</b>                            | Mean (SD)           | 6.92 (3.82)                                                          | 6.42 (4.60)                                               | 0.50        |
| <b>Number of<br/>days from<br/>discharge until<br/>HBR</b> | Mean (SD)           | 4.48 (3.74)                                                          | 4.63 (5.10)                                               | 0.85        |
| <b>Overall<br/>satisfaction at<br/>the end of<br/>HBR</b>  | Not satisfied       | 4 (8.0%)                                                             | 14 (14.7%)                                                | 0.21        |
|                                                            | Partially satisfied | 5 (10.0%)                                                            | 16 (16.8%)                                                |             |
|                                                            | Very satisfied      | 41 (82.0%)                                                           | 65 (68.4%)                                                |             |
| <b>Level of<br/>independence</b>                           | Mean (SD)           | 2.60 (0.75)                                                          | 2.88 (0.80)                                               | <b>0.04</b> |
